# Supplementary material
Source: PubMed Central journal article supplement (PMC4032089)
Supplement: NIHMS575243-supplement-Supp_TableS1-S2___FigureS1-S7.pdf [file NIHMS575243-supplement-Supp_TableS1-S2___FigureS1-S7.pdf]

## **SUPPORTING INFORMATION**

### **SUPPLEMENTAL MATERIALS AND METHODS**

#### **Strain and DNA Constructions (detailed description)**

The *ume6Δ/+* strain (DT208) was constructed as follows: approximately 500 bp of 5' and 3' flanking sequences were generated using primer pairs 1/2 and 3/4 (see Table S1 for a complete listing of primers used in this study), respectively. The 5' flank is located immediately upstream of the region -19.3 kb from the *UME6* start codon and the 3' flank is immediately downstream of the *UME6* coding sequence. The 5' and 3' flanks were next digested with BamHI-HindIII and NotI-ApaI, respectively, and cloned into plasmid pSN52 [1]. The *ume6Δ::HIS1* construct was generated by PCR from the resulting plasmid using primer pair 5/6 and transformed into strain SN152 to generate *ume6Δ/+* (DT208). *ume6Δ/+* was next used as a parent strain to generate *UME6* upstream intergenic region deletion strains DT297, DT290, DT281, DT315, DT299 and DT341 using the *SAT1* flipper technique [2]. Briefly, a 5' flanking sequence immediately adjacent to the *UME6* -19.3 kb region was generated using primer pair 7/8, digested with KpnI and XhoI, and cloned into pSFS2 to generate plasmid 5' *ume6Δ/+* pSFS2. 3' flanking sequences adjacent to the *UME6* -9.1 kb, -8.0 kb, -7.0 kb, -6.0 kb, -5.0 kb and -4.2 kb regions were generated using primers 9-20, digested with NotI and SacII, and cloned into 5' *ume6Δ/+* pSFS2. The resulting constructs were digested with KpnI and SacII to release each respective *SAT1*-marked deletion construct, which, in turn, was used to transform the *ume6Δ/+* strain. The *SAT1* marker was then looped out of each resulting *UME6* upstream intergenic region deletion strain as described previously [2]. To generate the *UME6*<sub>-6kb</sub> *UR-lacZ* strain, *UME6* upstream intergenic regions from -1801 to -6011 and -1 to -2541 were amplified using primer pairs 21/22 and 23/24, respectively. The resulting PCR products were digested with PstI-HindIII and HindIII-PstI, respectively, and cloned separately into plasmid pBS [3]. The *UME6* -1 to -2077 bp fragment was released from pBS by digesting with SphI and

HindIII and the *UME6* ~ -2077 bp to -6011 bp fragment was released from pBS by digesting with HindIII and PstI. A 3-piece ligation was used to clone both fragments into plasmid placbasal digested with PstI and SphI, generating plasmid pUME6-6kb UR-lac. placbasal was also digested with XhoI and Sall, filled-in using Klenow DNA polymerase, and religated to generate plasmid plac. Both plasmids pUME6-6 kb UR-lac and plac were linearized with StuI at *RPS1* and transformed into CAI4 to generate the final *UME6-6 kb UR-lacZ* and *lacZ* strains, respectively. The *UME6* 5' *utrΔ/Δ* strain was generated using the *SAT1* flipper method [2]. Briefly, 5' and allele-specific 3' flanks immediately adjacent to the *UME6* 5' UTR were amplified using primer pairs 25/26, 27 /28 and 27 /29, respectively. The 5' flank was digested with KpnI and XhoI and each 3' flank was digested with NotI and SacII. The digested flanks were cloned into pSFS2 and the resulting plasmids were digested with KpnI and SacII to release the *UME6* 5' *utrΔ::SAT1* fragments, which were sequentially used to transform wild-type strain DK318. Following deletion of each *UME6* 5' UTR allele, the *SAT1* marker was looped out, ultimately generating the final *UME6* 5' *utrΔ/Δ* strain. To construct the 5' *utrΔ-UME6-MYC* strain (DT640), *UME6-MYC* (HLY4078) was transformed with the *UME6* 5' *utrΔ::SAT1* fragment described above to delete the 5' UTR of the Myc-tagged *UME6* allele. The *SAT1* marker was then looped out to generate the final 5' *utrΔ-UME6-MYC* strain. To construct *tetO-5'UTR-UME6* strain (DT553), 5' and 3' flanking sequences adjacent to the *UME6* 5' UTR were amplified using primer pairs 30/31 and 32/33, respectively. The 5' flank spans -3134 bp to -3696 bp and the 3' flank spans -2514 bp to -3072 bp relative to the *UME6* start codon (+1). The 5' flank was digested with KpnI and XhoI and the 3' flank was digested with SpeI and SacII. Both flanks were cloned into p97CAU1 to generate plasmid p97CAU1-5'UTR-UME6-OEx. This plasmid was digested with KpnI and SacII to release a fragment containing the *URA3* marker, *tetO* operator and *UME6* 5' UTR flanks, which was used to transform strain THE1, ultimately generating the *tetO-5'UTR-UME6* strain (DT553). To construct the ACT1<sub>pr</sub>- GFP plasmid, *RPS1* was amplified from

genomic DNA using primer pair 34/35, digested with SacI and SpeI, and cloned into plasmid pFA GFP $\gamma$  URA3 [4]. The resulting plasmid was digested with PstI and SpeI to release a fragment containing GFP $\gamma$ , URA3 and RPS1, which, in turn was cloned into pBS [3] to generate pBS-GFP. The ACT1 promoter was next amplified from plasmid Clp-LexA [5] using primer pair 36 /37, digested with KpnI and XhoI and cloned into pBS-GFP. To generate plasmid ACT1<sub>pr</sub>-UME6-5'UTR-GFP, the UME6 5' UTR plus UME6 start codon was amplified from genomic DNA using primer pair 38/39, digested with XhoI and PstI, and cloned into ACT1<sub>pr</sub>- GFP cut with the same restriction enzymes. To generate plasmid ACT1<sub>pr</sub>-UME6-5'UTR uorf1 $\Delta$  uorf2 $\Delta$  -GFP, PCR site-directed mutagenesis was performed on the ACT1<sub>pr</sub>-UME6-5'UTR-GFP plasmid to first delete uORF1. Briefly, complementary primers (52/53), were designed incorporating flanking regions for uORF1 and the resulting PCR product was digested with DpnI and transformed into *E. coli* Z-DH5 $\alpha$ . The recovered plasmid was then sequenced to confirm the deletion. Next, a similar strategy was used on this plasmid in order to delete uORF2 with primer pairs 54/55 and 56/57. ACT1<sub>pr</sub>- GFP, ACT1<sub>pr</sub>-UME6-5'UTR-GFP and ACT1<sub>pr</sub>-UME6-5'UTR uorf1 $\Delta$  uorf2 $\Delta$  -GFP plasmids were linearized at RPS1 by digestion with StuI and transformed into strain CAI4 to generate the ACT1<sub>pr</sub>- GFP, ACT1<sub>pr</sub>-UME6-5'UTR-GFP and ACT1<sub>pr</sub>-UME6-5'UTR uorf1 $\Delta$  uorf2 $\Delta$  -GFP final strains. All integration events were confirmed by whole cell PCR using primers flanking the integration sites.

## References

1. Noble SM, Johnson AD (2005) Strains and strategies for large-scale gene deletion studies of the diploid human fungal pathogen *Candida albicans*. *Eukaryot Cell* 4: 298-309.
2. Reuss O, Vik A, Kolter R, Morschhauser J (2004) The SAT1 flipper, an optimized tool for gene disruption in *Candida albicans*. *Gene* 341: 119-127.
3. Short JM, Fernandez JM, Sorge JA, Huse WD (1988) Lambda ZAP: a bacteriophage lambda expression vector with in vivo excision properties. *Nucleic Acids Res* 16: 7583-7600.

4. Zhang C, Konopka JB (2010) A photostable green fluorescent protein variant for analysis of protein localization in *Candida albicans*. *Eukaryot Cell* 9: 224-226.
5. Russell CL, Brown AJ (2005) Expression of one-hybrid fusions with *Staphylococcus aureus* *lexA* in *Candida albicans* confirms that Nrg1 is a transcriptional repressor and that Gcn4 is a transcriptional activator. *Fungal Genet Biol* 42: 676-683.

Table S1

## Strains used in this study

| Strain                            | Genotype                                                                                                                                                 | Source     |
|-----------------------------------|----------------------------------------------------------------------------------------------------------------------------------------------------------|------------|
| SC5314 (WT)                       | Prototroph                                                                                                                                               | (1)        |
| CAF2-1 (WT)                       | <i>ura3Δ::imm<sup>434</sup>/URA3 iro1Δ::imm<sup>434</sup>/IRO1</i>                                                                                       | (2)        |
| DK318 (WT)                        | <i>arg4Δ::ARG4 /arg4Δ his1Δ::HIS1/his1Δ ura3Δ::imm<sup>434</sup>/URA3 iro1Δ::imm<sup>434</sup>/IRO1</i>                                                  | (3)        |
| CAI4                              | <i>ura3Δ::imm<sup>434</sup>/ura3Δ::imm<sup>434</sup> iro1Δ::imm<sup>434</sup>/iro1Δ::imm<sup>434</sup></i>                                               | (2)        |
| DK312 ( <i>ume6Δ/Δ</i> )          | <i>ume6Δ::C.m.LEU2/ume6Δ::C.d.HIS1<br/>arg4Δ::ARG4/arg4Δ leu2Δ/leu2Δ his1Δ/his1Δ<br/>ura3Δ::imm<sup>434</sup>/URA3 iro1Δ::imm<sup>434</sup>/IRO1</i>     | (3)        |
| DT553 ( <i>UME6 5' utrΔ/Δ</i> )   | <i>arg4Δ::ARG4 /arg4Δ his1Δ::HIS1/his1Δ<br/>UME6 5' utrΔ::frt/UME6 5' utrΔ::frt<br/>ura3Δ::imm<sup>434</sup>/URA3 iro1Δ::imm<sup>434</sup>/IRO1</i>      | This study |
| MBY38 ( <i>tetO-UME6</i> )        | <i>ade2::hisG/ade2::hisG ura3::imm<sup>434</sup>/ura3::imm<sup>434</sup><br/>ENO1/eno1::ENO1-tetR-ScHAP4AD-3×HA-ADE2<br/>tetO-UME6::URA3/UME6</i>        | (4)        |
| DT515 ( <i>tetO-5' UTR-UME6</i> ) | <i>ade2::hisG/ade2::hisG ura3::imm<sup>434</sup>/ura3::imm<sup>434</sup><br/>ENO1/eno1::ENO1-tetR-ScHAP4AD-3×HA-ADE2<br/>tetO-5' UTR-UME6::URA3/UME6</i> | This study |
| SN152                             | <i>arg4Δ/arg4Δ leu2Δ/leu2Δ his1Δ/his1Δ ura3Δ::imm<sup>434</sup>/URA3<br/>iro1Δ::imm<sup>434</sup>/IRO1</i>                                               | (5)        |
| DT208 ( <i>ume6Δ/+</i> )          | <i>ume6<sub>-19.3 kb through ORF</sub>Δ::C.m.HIS1/UME6<br/>leu2Δ /leu2Δ arg4Δ /arg4Δ ura3Δ::imm<sup>434</sup>/URA3<br/>iro1Δ::imm<sup>434</sup>/IRO1</i> | This study |

|                                                         |                                                                                                                                                                                                                                                                                                   |            |
|---------------------------------------------------------|---------------------------------------------------------------------------------------------------------------------------------------------------------------------------------------------------------------------------------------------------------------------------------------------------|------------|
| DT297 ( <i>ume6</i> <sub>-9.1 kb to -19.3 kb</sub> Δ/Δ) | <i>ume6</i> <sub>-19.3 kb through ORF</sub> Δ:: <i>C.m.HIS1</i> / <i>ume6</i> <sub>-9.1kb to -19.3kb</sub> Δ:: <i>frt leu2</i> Δ/ <i>leu2</i> Δ <i>arg4</i> Δ/ <i>arg4</i> Δ <i>ura3</i> Δ:: <i>imm</i> <sup>434</sup> / <i>URA3</i><br><i>iro1</i> Δ:: <i>imm</i> <sup>434</sup> / <i>IRO1</i>   | This study |
| DT290 ( <i>ume6</i> <sub>-8.0 kb to -19.3 kb</sub> Δ/Δ) | <i>ume6</i> <sub>-19.3 kb through ORF</sub> Δ:: <i>C.m.HIS1</i> / <i>ume6</i> <sub>-8.0 kb to -19.3 kb</sub> Δ:: <i>frt leu2</i> Δ/ <i>leu2</i> Δ <i>arg4</i> Δ/ <i>arg4</i> Δ<br><i>ura3</i> Δ:: <i>imm</i> <sup>434</sup> / <i>URA3</i> <i>iro1</i> Δ:: <i>imm</i> <sup>434</sup> / <i>IRO1</i> | This study |
| DT281 ( <i>ume6</i> <sub>-7.0 kb to -19.3 kb</sub> Δ/Δ) | <i>ume6</i> <sub>-19.3 kb through ORF</sub> Δ:: <i>C.m.HIS1</i> / <i>ume6</i> <sub>-7.0 kb to -19.3 kb</sub> Δ:: <i>frt leu2</i> Δ/ <i>leu2</i> Δ <i>arg4</i> Δ/ <i>arg4</i> Δ<br><i>ura3</i> Δ:: <i>imm</i> <sup>434</sup> / <i>URA3</i> <i>iro1</i> Δ:: <i>imm</i> <sup>434</sup> / <i>IRO1</i> | This study |
| DT315 ( <i>ume6</i> <sub>-6.0 kb to -19.3 kb</sub> Δ/Δ) | <i>ume6</i> <sub>-19.3 kb through ORF</sub> Δ:: <i>C.m.HIS1</i> / <i>ume6</i> <sub>-6.0 kb to -19.3 kb</sub> Δ:: <i>frt leu2</i> Δ/ <i>leu2</i> Δ <i>arg4</i> Δ/ <i>arg4</i> Δ<br><i>ura3</i> Δ:: <i>imm</i> <sup>434</sup> / <i>URA3</i> <i>iro1</i> Δ:: <i>imm</i> <sup>434</sup> / <i>IRO1</i> | This study |
| DT299 ( <i>ume6</i> <sub>-5.0 kb to -19.3 kb</sub> Δ/Δ) | <i>ume6</i> <sub>-19.3 kb through ORF</sub> Δ:: <i>C.m.HIS1</i> / <i>ume6</i> <sub>-5.0 kb to -19.3 kb</sub> Δ:: <i>frt leu2</i> Δ/ <i>leu2</i> Δ <i>arg4</i> Δ/ <i>arg4</i> Δ<br><i>ura3</i> Δ:: <i>imm</i> <sup>434</sup> / <i>URA3</i> <i>iro1</i> Δ:: <i>imm</i> <sup>434</sup> / <i>IRO1</i> | This study |
| DT341 ( <i>ume6</i> <sub>-4.2 kb to -19.3 kb</sub> Δ/Δ) | <i>ume6</i> <sub>-19.3 kb through ORF</sub> Δ:: <i>C.m.HIS1</i> / <i>ume6</i> <sub>-4.2 kb to -19.3 kb</sub> Δ:: <i>frt leu2</i> Δ/ <i>leu2</i> Δ <i>arg4</i> Δ/ <i>arg4</i> Δ<br><i>ura3</i> Δ:: <i>imm</i> <sup>434</sup> / <i>URA3</i> <i>iro1</i> Δ:: <i>imm</i> <sup>434</sup> / <i>IRO1</i> | This study |
| DT133 ( <i>lacZ</i> )                                   | <i>ura3</i> Δ:: <i>imm</i> <sup>434</sup> / <i>ura3</i> Δ:: <i>imm</i> <sup>434</sup> <i>iro1</i> Δ:: <i>imm</i> <sup>434</sup> / <i>IRO1</i><br><i>rps1</i> :: <i>S.t. lacZ</i> - <i>URA3/RPS1</i>                                                                                               | This study |
| DT389 ( <i>UME6</i> <sub>-6 kb ur</sub> - <i>lacZ</i> ) | <i>ura3</i> Δ:: <i>imm</i> <sup>434</sup> / <i>ura3</i> Δ:: <i>imm</i> <sup>434</sup> <i>iro1</i> Δ:: <i>imm</i> <sup>434</sup> / <i>IRO1</i><br><i>rps1</i> :: <i>UME6</i> <sub>-6 kb ur</sub> - <i>S.t. lacZ</i> - <i>URA3/RPS1</i>                                                             | This study |

|                                                                            |                                                                                                                                                                  |            |
|----------------------------------------------------------------------------|------------------------------------------------------------------------------------------------------------------------------------------------------------------|------------|
| DT590 ( <i>ACT1<sub>pr</sub>-GFP</i> )                                     | <i>ura3Δ::imm<sup>434</sup>/ura3Δ::imm<sup>434</sup> iro1Δ::imm<sup>434</sup>/IRO1</i><br><i>rps1::ACT1<sub>pr</sub>-GFP-URA3/RPS1</i>                           | This study |
| DT585 ( <i>ACT1<sub>pr</sub>-UME6 5' UTR-GFP</i> )                         | <i>ura3Δ::imm<sup>434</sup>/ura3Δ::imm<sup>434</sup> iro1Δ::imm<sup>434</sup>/IRO1</i><br><i>rps1::ACT1<sub>pr</sub>-UME6-5'UTR-GFP-URA3/RPS1</i>                | This study |
| DT625 ( <i>ACT1<sub>pr</sub>-UME6-5'UTR uorf1Δ</i><br><i>uorf2Δ -GFP</i> ) | <i>ura3Δ::imm<sup>434</sup>/ura3Δ::imm<sup>434</sup> iro1Δ::imm<sup>434</sup>/IRO1</i><br><i>rps1::ACT1<sub>pr</sub>-UME6-5'UTR uorf1Δ uorf2Δ -GFP-URA3/RPS1</i> | This study |
| HLY4078 ( <i>UME6-MYC</i> )                                                | <i>ura3::1 imm434/ura3::1 imm434</i><br><i>UME6/UME6-13MYC-URA3</i>                                                                                              | (6)        |
| DT640 ( <i>5' utrΔ-UME6-MYC</i> )                                          | <i>ura3::1 imm434/ura3::1 imm434</i><br><i>UME6/5' utrΔ::ftr-UME6-13MYC-URA3</i>                                                                                 | This study |

---

*C.d.* = *Candida dubliniensis*

*C.m.* = *Candida maltosa*

*S.t.* = *Streptococcus thermophilus*

## References

1. Gillum, A. M., E. Y. Tsay, and D. R. Kirsch. (1984) Isolation of the *Candida albicans* gene for orotidine-5'-phosphate decarboxylase by complementation of *S. cerevisiae ura3* and *E. coli pyrF* mutations. *Mol Gen Genet* 198:179-182.
2. Fonzi WA & Irwin MY (1993) Isogenic strain construction and gene mapping in *Candida albicans*. *Genetics* 134(3):717-728.
3. Banerjee M, *et al.* (2008) *UME6*, a novel filament-specific regulator of *Candida albicans* hyphal extension and virulence *Mol Biol Cell* 19(4):1354-1365.
4. Carlisle PL, *et al.* (2009) Expression levels of a filament-specific transcriptional regulator are sufficient to determine *Candida albicans* morphology and virulence. *Proc Natl Acad Sci U S A* 106:599-604.
5. Noble SM & Johnson AD (2005) Strains and strategies for large-scale gene deletion studies of the diploid human fungal pathogen *Candida albicans*. *Eukaryot Cell* 4(2):298-309.
6. Lu Y, Su C, & Liu H (2012) A GATA transcription factor recruits Hda1 in response to reduced Tor1 signaling to establish a hyphal chromatin state in *Candida albicans*. *PLoS Pathog* 8(4):e1002663.



**Table S2****Primers used in this study**

| #  | Primer Name | Sequence                               | Description                                                            |
|----|-------------|----------------------------------------|------------------------------------------------------------------------|
| 1  | DTO202      | agtactgaaggatccCTGTGTGTGTGTGGGTGG      | 5' <i>UME6</i> -19.3 kb flank upstream primer for cloning into pSN52   |
| 2  | DTO203      | agtactgaaaagcttCAGCAACAGCAACAGTGCC     | 3' <i>UME6</i> -19.3 kb flank upstream primer for cloning into pSN52   |
| 3  | DTO204      | agtactgaagcgccgcCAGGTTGACGGTTGACGGTGG  | 5' <i>UME6</i> -19.3 kb flank downstream primer for cloning into pSN52 |
| 4  | DTO205      | agtactgaaggcccGGGAATGAGTTACAGTTTATCGGG | 3' <i>UME6</i> -19.3 kb flank downstream primer for cloning into pSN52 |
| 5  | DTO186      | CTGTGTGTGTGTGGGTGG                     | 5' primer to generate <i>ume6Δ::HIS1</i>                               |
| 6  | DTO189      | GGGAATGAGTTACAGTTTATCGGG               | 3' primer to generate <i>ume6Δ::HIS1</i>                               |
| 7  | DTO193      | agtactgaagtaccCTGTGTGTGTGTGGGTGG       | 5' <i>UME6</i> -19.3 kb flank upstream primer for cloning into pSFS2   |
| 8  | DTO194      | agtactgaactcgagCAGGTTGACGGTTGACGGTGG   | 3' <i>UME6</i> -19.3 kb flank upstream primer for cloning into pSFS2   |
| 9  | DTO226      | agtactgaagcgccgcGATGTAGTTTCCACAGCACG   | 5' <i>UME6</i> -9.1 kb flank downstream primer for cloning into pSFS2  |
| 10 | DTO227      | agtactgaaccgcgCCTGACTCTGTTTGAAGGG      | 3' <i>UME6</i> -9.1 kb flank downstream primer for cloning into pSFS2  |
| 11 | DTO224      | agtactgaagcgccgcGTATTCTATCTGGAAGTGG    | 5' <i>UME6</i> -8.0 kb flank downstream primer for cloning into pSFS2  |
| 12 | DTO225      | agtactgaaccgcgGTGTGATGGAGTGATGGC       | 3' <i>UME6</i> -8.0 kb flank downstream primer for cloning into pSFS2  |
| 13 | DTO222      | agtactgaagcgccgcGAGGCAAATGGCAAGCACC    | 5' <i>UME6</i> -7.0 kb flank downstream primer for cloning into pSFS2  |
| 14 | DTO223      | agtactgaaccgcgGTTGATGGTTATGCACCC       | 3' <i>UME6</i> -7.0 kb flank downstream primer for cloning into pSFS2  |
| 15 | DTO220      | agtactgaagcgccgcCTAGACCTAAACTACTACG    | 5' <i>UME6</i> -6.0 kb flank downstream primer for cloning into pSFS2  |
| 16 | DTO221      | agtactgaaccgcgCAACATTATCACCTAGACCC     | 3' <i>UME6</i> -6.0 kb flank downstream primer for cloning into pSFS2  |
| 17 | DTO218      | agtactgaagcgccgcGCAAATTACTTGCTGCATGTGG | 5' <i>UME6</i> -5.0 kb flank downstream primer for cloning into pSFS2  |

|    |        |                                                                      |                                                                                             |
|----|--------|----------------------------------------------------------------------|---------------------------------------------------------------------------------------------|
| 18 | DTO219 | agtactgaaccgcgGTAGCCTCAATTAATCTTGACC                                 | 3' <i>UME6</i> -5.0 kb flank downstream primer for cloning into pSFS2                       |
| 19 | DTO239 | agtactgaagcgccgcCCATTCATTCAGTCATTCG                                  | 5' <i>UME6</i> -4.2 kb flank downstream primer for cloning into pSFS2                       |
| 20 | DTO240 | agtactgaaccgcgCTTGATCTAGTTGTGGATGTGG                                 | 3' <i>UME6</i> -4.2 kb flank downstream primer for cloning into pSFS2                       |
| 21 | DTO243 | agtactgaactgcagGTCGACCTAGACCTAAACTACTACG                             | 5' <i>UME6</i> -6 kb UR upstream primer for cloning into placbasal                          |
| 22 | DTO90  | CTGTTAAGTTGTTGTGGTAGG                                                | 3' <i>UME6</i> -6 kb UR primer downstream of native HindIII site for cloning into placbasal |
| 23 | DTO89  | GGTCCAGTCGACCAAGAACAATCCATTCTCG                                      | 5' <i>UME6</i> -6 kb UR primer upstream of native HindIII site for cloning into placbasal   |
| 24 | DTO250 | agtactgaactgcaggcatgcTTATACAGTGGATTA AAAAATAAAACTAATTGGAAGTAAATTGAGG | 3' <i>UME6</i> -6 kb UR downstream primer for cloning into placbasal                        |
| 25 | DTO262 | agtactgaaggtaccCTACAACCACATCCACATCC                                  | 5' <i>UME6</i> 5' UTR upstream primer for cloning into pSFS2                                |
| 26 | DTO263 | agtactgaactcgagCCTAAATGTCACCTCAAATACC C                              | 3' <i>UME6</i> 5' UTR upstream primer for cloning into pSFS2                                |
| 27 | PCO32  | gatcataccgaacagagcgccgcCCTCAATTTACTTCCAATTAG                         | 5' <i>UME6</i> 5' UTR downstream primer for cloning into pSFS2                              |
| 28 | DTO272 | agtactgaaccgcgGCATGATCATGACCATGACC                                   | 3' <i>UME6</i> 5' UTR orf19.1822 downstream primer for cloning into pSFS2                   |
| 29 | DTO271 | agtactgaaccgcgCATCATCATGATCATGACC                                    | 3' <i>UME6</i> 5' UTR orf19.9381 downstream primer for cloning into pSFS2                   |
| 30 | DTO264 | agtactgaaggtaccGTCGTAGCTGCAACAACTAGTTACC                             | 5' <i>UME6</i> 5' UTR upstream primer for cloning into p97CAU1                              |
| 31 | DTO265 | agtactgaactcgagCTTCTTTCGTGAGGAGGG                                    | 3' <i>UME6</i> 5' UTR upstream primer for cloning into p97CAU1                              |
| 32 | DTO266 | agtactgaaactagtGGAACATCAATTTACATTTCC                                 | 5' <i>UME6</i> 5' UTR downstream primer for cloning into p97CAU1                            |
| 33 | DTO267 | agtactgaaccgcgTGTAATAAACGAGAATGG                                     | 3' <i>UME6</i> 5' UTR downstream primer for                                                 |

|    |        |                                                                             |                                                                                          |
|----|--------|-----------------------------------------------------------------------------|------------------------------------------------------------------------------------------|
| 34 | DTO293 | agtactgaagagctcATGGCTGTCGGTAAAAACAAG                                        | cloning into p97CAU1<br>5' <i>RPS1</i> primer for cloning<br>into pFA-GFP $\gamma$ -URA3 |
| 35 | DTO294 | agtactgaaactagtTTAAACAGATTCTAAAACAACA<br>TC                                 | 3' <i>RPS1</i> primer for cloning<br>into pFA-GFP $\gamma$ -URA3                         |
| 36 | DTO298 | agtactgaaggtaccCTATTAAGATCACCAGCC                                           | 5' <i>ACT1</i> promoter primer<br>for cloning into pBS                                   |
| 37 | DTO299 | agtactgaactcgagTTTAAGCTTTTTGAATGA                                           | 3' <i>ACT1</i> promoter primer<br>for cloning into pBS                                   |
| 38 | DTO300 | agtactgaactcgagGGAACATCAATTTACATTTCC                                        | 5' <i>UME6</i> 5' UTR primer<br>for cloning into pBS                                     |
| 39 | DTO289 | agtactgaactgcagCATTTATACAGTGGATTAAAAA<br>ATAAACTAATTGGAAGTAAATTGAGG         | 3' <i>UME6</i> 5' UTR primer<br>for cloning into pBS                                     |
| 40 | DTO169 | CGTCTTTGCAGATCGTACCC                                                        | 5' <i>lacZ</i> primer for qRT-<br>PCR                                                    |
| 41 | DTO170 | CTGGGAATGTTGCTTCTTCG                                                        | 3' <i>lacZ</i> primer for qRT-<br>PCR                                                    |
| 42 | DTO85  | TTGCTCCAGAAGAACATCCAG                                                       | 5' <i>ACT1</i> primer for qRT-<br>PCR                                                    |
| 43 | DTO86  | AGTAACACCATCACCAGAATCC                                                      | 3' <i>ACT1</i> primer for qRT-<br>PCR                                                    |
| 44 | DTO167 | GAACAATGGTGGTGGTAGTGG                                                       | 5' <i>UME6</i> primer for qRT-<br>PCR                                                    |
| 45 | DTO168 | AATTCGACAAATCCAACATCC                                                       | 3' <i>UME6</i> primer for qRT-<br>PCR                                                    |
| 46 | DTO314 | CTCCAATTGGTGATGGTCC                                                         | 5' <i>GFP</i> primer for qRT-<br>PCR                                                     |
| 47 | DTO316 | GTAACAAATTCTAACAAGACC                                                       | 3' <i>GFP</i> primer for qRT-<br>PCR                                                     |
| 48 | DK239  | GTTGGGACTAGGATTGGTAAAGC                                                     | 5' <i>UME6</i> primer for<br>Northern probe                                              |
| 49 | DK240  | GATGTGGAGTAGACTTGGATAATGG                                                   | 3' <i>UME6</i> primer for<br>Northern probe                                              |
| 50 | DK523  | GTTGACCGAAGCTCCAATGAATCC                                                    | 5' <i>ACT1</i> primer for<br>Northern probe                                              |
| 51 | DK526  | CAGCAATACCTGGGAACATGG                                                       | 3' <i>ACT1</i> primer for<br>Northern probe                                              |
| 52 | DTO312 | GAGAAATCTTTTTTTTTTTTTTTTATCGTTGC<br>CCCCTTTTTCTTAC                          | 5' primer for <i>UME6</i> 5'<br>UTR uORF1 deletion                                       |
| 53 | DTO313 | GTAAGAAAAAAGTGGGGCAACGATAAAAAA<br>AAAAAAAAAAGATTTCTC                        | 3' primer for <i>UME6</i> 5'<br>UTR uORF1 deletion                                       |
| 54 | DTO324 | GGTTTTTCTATTGTTTAATAAGAAGGTTCTA<br>TTTGGGGAGTTGCTTATTATTGATATTAATAA<br>TTC  | 5' primer for <i>UME6</i> 5'<br>UTR uORF2 <sub>1-46</sub> bp deletion                    |
| 55 | DTO323 | GAATTATTAATATCAATAATAAGCAACTCCC<br>CAAATAGAACCTTCTTATTAAACAATAGAAA<br>AAACC | 3' primer for <i>UME6</i> 5'<br>UTR uORF2 <sub>1-46</sub> bp deletion                    |

|    |        |                                                             |                                                                                             |
|----|--------|-------------------------------------------------------------|---------------------------------------------------------------------------------------------|
| 56 | DTO325 | GGTTTTTTCTATTGTTTAATAAGAAGGTTCTA<br>TTTGAGGGAAAAAGAATTCTTCG | 5' primer for <i>UME6</i> 5'<br>UTR uORF <sub>247-102</sub> bp<br>deletion                  |
| 57 | DTO326 | CGAAGAATTCTTTTTTCCCTCAAATAGAACCT<br>TCTTATTAAACAATAGAAAAACC | 3' primer for <i>UME6</i> 5'<br>UTR uORF <sub>247-102</sub> bp<br>deletion                  |
| 58 | DTO332 | TTTTTGCGCAAGTTAAAATCC                                       | 5' <i>UME6</i> 5' UTR primer<br>for qRT-PCR                                                 |
| 59 | DTO333 | CGAGATTTTCTGATTGATTTATGC                                    | 3' <i>UME6</i> 5' UTR primer<br>for qRT-PCR                                                 |
| 60 | DTO76  | CTCTTGGTATCTCTTTACCC                                        | 3' <i>UME6</i> 5' UTR 5' RACE<br>primer (for -3041 transcript<br>start site identification) |
| 61 | DTO258 | CAACGATACTAACGACGAGGG                                       | 3' <i>UME6</i> 5' UTR 5' RACE<br>primer (for -1923 transcript<br>start site identification) |
| 62 | DTO259 | CTGGAGATAATGAATAGTGGG                                       | 3' <i>UME6</i> 5' UTR 5' RACE<br>primer (for -2126 transcript<br>start site identification) |
| 63 | DTO302 | TGCAAAGCCAATTCCCGAAG                                        | 5' Solaris spike-in primer<br>for qRT-PCR                                                   |
| 64 | DTO303 | CCATTGTAGTGAACAGTAGGAC                                      | 3' Solaris spike-in primer<br>for qRT-PCR                                                   |

Note: Lowercase bases indicate flanking sequences within primers that contain restriction sites for cloning.

## SUPPLEMENTAL FIGURES

**Figure S1. 5' RACE analysis of the *UME6* transcript.** Total RNA and cDNA were prepared from cells of a wild-type (SC5314) strain following induction in YEPD + 10% serum at 37°C. (A) 5' RACE analysis was performed using the indicated primers (reverse arrows) within the *UME6* 5' UTR to yield the indicated PCR products (red bars). +1 indicates the *UME6* translation start site. (B and C) The 5' RACE PCR products described in (A) were run on 0.8% agarose gels to determine their size. A DNA ladder is shown at left (sizes in kb). "--" indicates minus reverse transcriptase (RT) control. The precise size and identity of these PCR products was also determined more accurately by sequencing.

**Figure S2. *UME6* transcript is expressed at equivalent levels in wild-type and *UME6* 5' utr  $\Delta/\Delta$  strains upon induction in Spider medium at 37°C.** The indicated strains were grown overnight in YEPD at 30°C, washed, diluted into pre-warmed YEPD at 30°C or Spider medium at 37°C, grown for 36 hours and harvested for total RNA preparation and cDNA synthesis. *UME6* transcript levels were determined by qRT-PCR analysis and normalized to those of an *ACT1* internal control. Fold induction for each strain was determined by dividing normalized *UME6* expression values at the 36-hr. time point by those at the 0 hr. time point. Data shown represents the average of three biological replicates run in technical duplicate (mean  $\pm$  SEM).

**Figure S3. The *UME6* 5' UTR inhibits *UME6*-driven hyphal growth under non-filament-inducing conditions in an overnight culture.** The indicated strains were grown as described in Figure 4A. Cell aliquots were harvested at the 24 hr. time point, fixed with 4.5% formaldehyde, washed twice with 1X PBS and visualized by DIC microscopy. Bar = 10  $\mu$ m.

**Figure S4. *ACT1* transcript abundance in polysome fractions.** Using primers specific to the *ACT1* transcript, qRT-PCR analysis was performed with RNA from the samples grown in YEPD + 10% serum at 37°C (no EDTA treatment) described in Figure 5. Data shown represents normalized mean *ACT1* transcript levels based on two independent experiments ( $\pm$  SEM).

**Figure S5. *UME6* transcript levels under a variety of filament-inducing conditions are not significantly affected by deletion of the 5' UTR.** Aliquots of cells grown for the Western analysis described in Figure 6 were used to prepare total RNA. Northern analysis was performed using 5  $\mu$ g of RNA from each sample and the indicated probes. *ACT1* is included as a loading control. Please note that for the 5' *utr* $\Delta$ -*UME6*-*MYC* strain, the upper band corresponds to the wild-type *UME6* allele and the lower band corresponds to the *MYC*-tagged *UME6* 5' *utr* $\Delta$  allele.

**Figure S6. The *UME6* 5' UTR is sufficient to inhibit protein expression by a heterologous *GFP* reporter, as determined by microscopy.** The indicated strains were grown overnight in YNB minimal medium at 30°C, diluted to OD<sub>600</sub> ~1.0 in YNB minimal medium at 30°C and grown for 3 hours. Cells were visualized by DIC (left panels) and fluorescence (right panels) microscopy. Bar =10  $\mu$ m.

**Figure S7. *GFP* transcript levels are not significantly affected by addition of the *UME6* 5' UTR.** Northern analysis was performed using 3  $\mu$ g of RNA samples described in Figure 7 and the indicated probes. *ACT1* is included as a loading control.

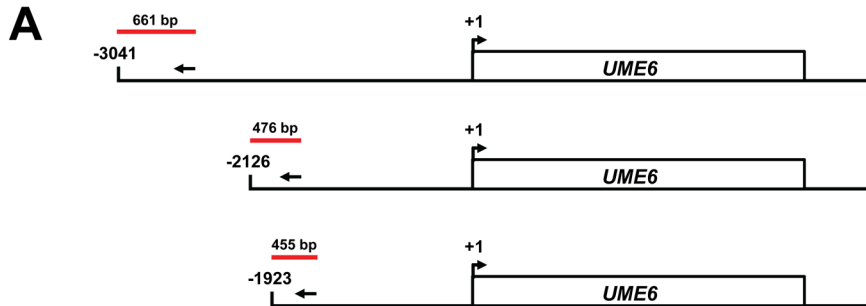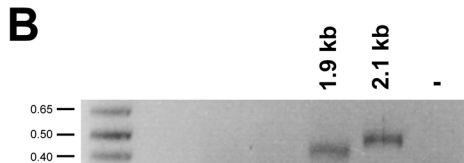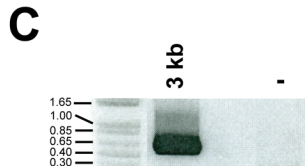

**Figure S1**

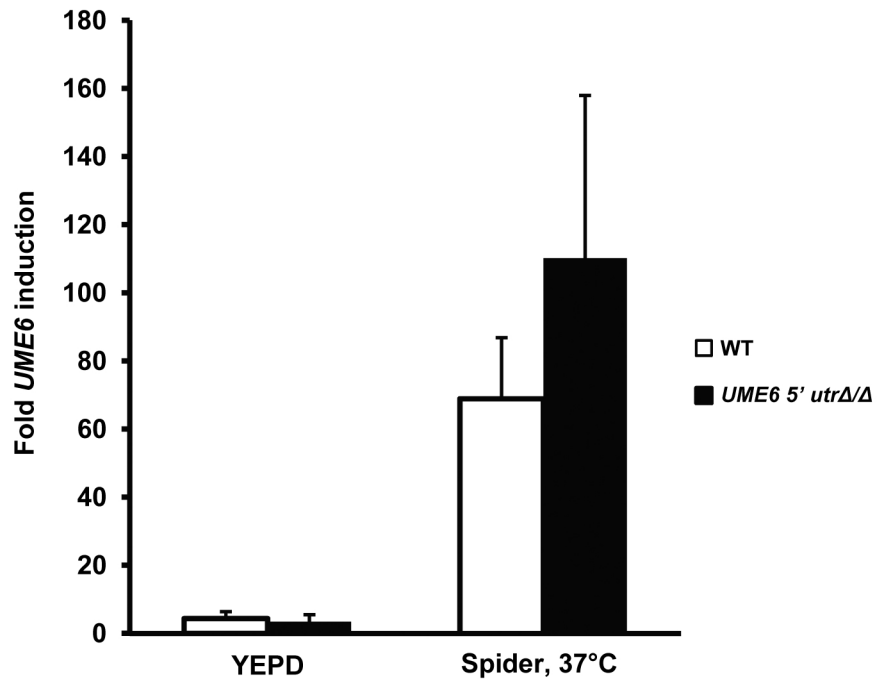

**Figure S2**



***tetO-5'UTR-UME6***

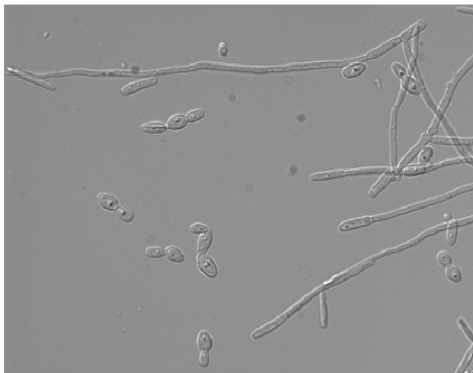

***tetO-UME6***

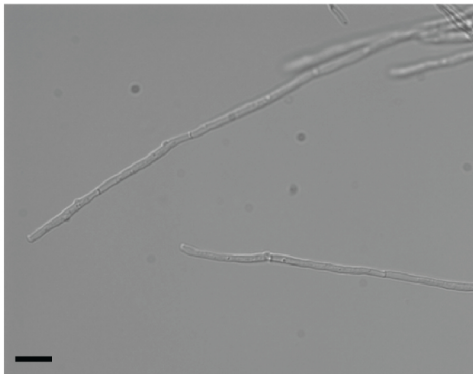

**Figure S3**

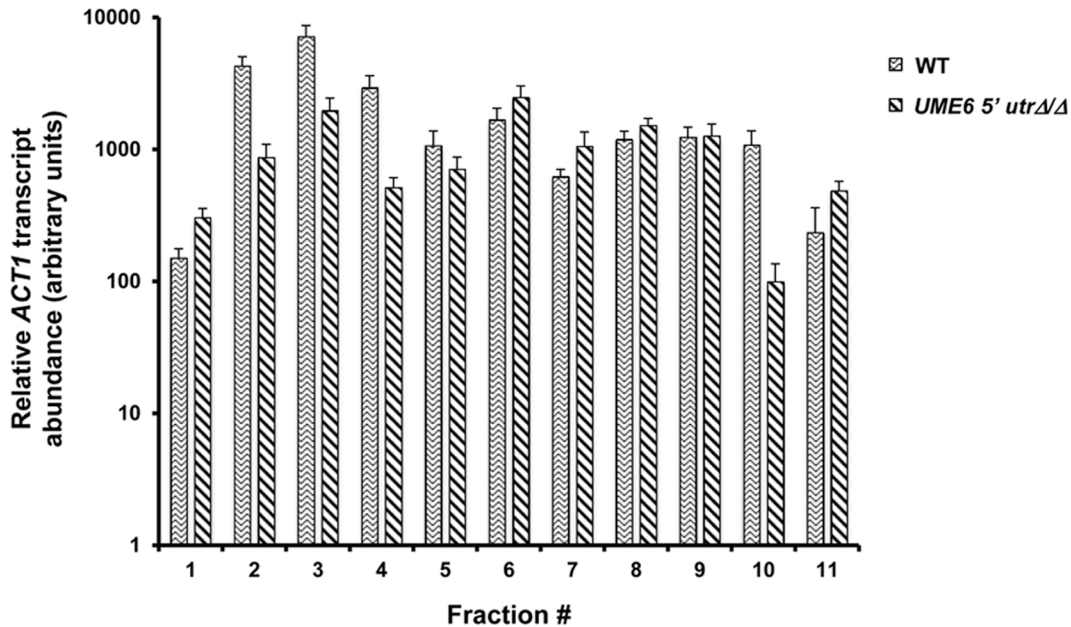

**Figure S4**

**A**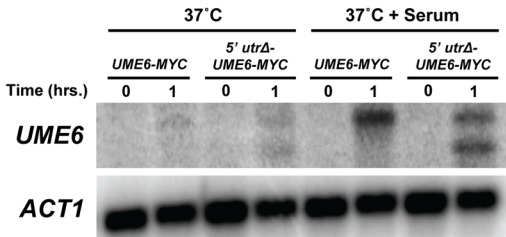**B**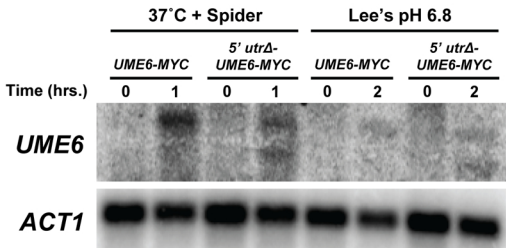**Figure S5**

**WT**

***ACT1<sub>pr</sub>-GFP***

***ACT1<sub>pr</sub>-UME6 5' UTR-GFP***

***ACT1<sub>pr</sub>-UME6 5' UTR  
uorf1Δ uorf2Δ-GFP***

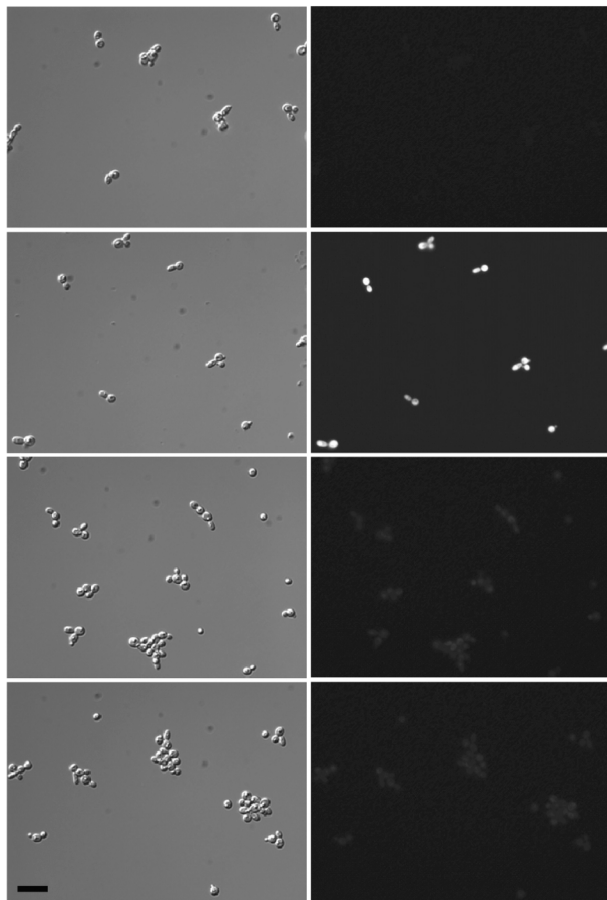

**Figure S6**

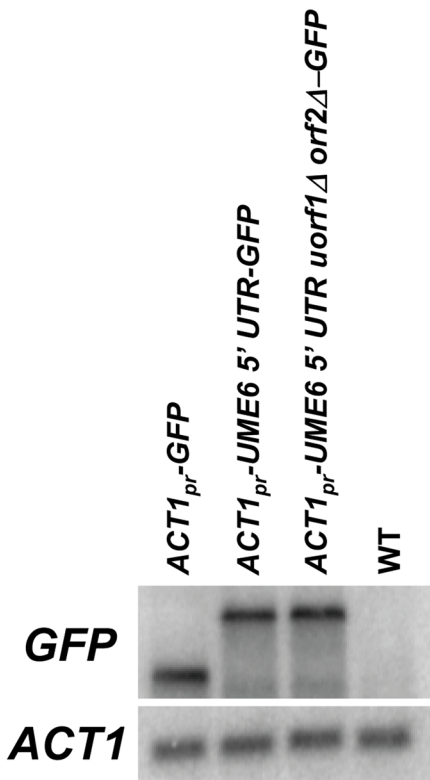

**Figure S7**
